# Supplementary material for: TERRA Promotes Telomere Shortening through Exonuclease 1–Mediated Resection of Chromosome Ends
Source: PLoS Genet. 2012 Jun 14;8(6):e1002747. doi: 10.1371/journal.pgen.1002747 (PMC3375253; doi:10.1371/journal.pgen.1002747)
Supplement: Table S1 — Strains used in this study. (PDF) [file pgen.1002747.s010.pdf]

Table S1. Strains used in this study.

| Code          | Name                         | Genotype                                                                                                                                              | Reference/source                   |
|---------------|------------------------------|-------------------------------------------------------------------------------------------------------------------------------------------------------|------------------------------------|
| YBL7          | wt BY4741                    | <i>MATa his3Δ1 leu2Δ0 ura3Δ0 met15Δ0</i>                                                                                                              | Euroscarf                          |
| YBL526        | <i>rat1-1</i>                | <i>MATa his3Δ1 leu2Δ0 ura3Δ0 met15Δ0 rat1-1::NAT</i>                                                                                                  | Iglesias <i>et al.</i> , 2011      |
| YNI157        |                              | <i>MATa his3Δ1 leu2Δ0 ura3Δ0 met15Δ0 Est2-8G-myc18::TRP1MX6</i>                                                                                       | Nahid Iglesias,<br>Virginia Zakian |
| YNI322        | <i>ku70Δ</i>                 | <i>MATa his3Δ1 leu2Δ0 ura3Δ0 met15Δ0 ku70::KAN</i>                                                                                                    | Brian Luke                         |
| YNI527        | <i>sir3Δ</i>                 | <i>MATa his3Δ1 leu2Δ0 ura3Δ0 met15Δ0 sir3::HIS3</i>                                                                                                   | Iglesias <i>et al.</i> , 2011      |
| LVPS-5        |                              | <i>MATa his3Δ1 leu2Δ0 ura3Δ0 met15Δ0 Est2-8G-myc18::TRP1MX6 trp1::NAT</i>                                                                             | This study                         |
| LVPS-11       |                              | <i>MATa his3Δ1 leu2Δ0 ura3Δ0 met15Δ0 Est2-8G-myc18::TRP1MX6 trp1::NAT ade2::tTA::KAN</i>                                                              | This study                         |
| LVPS-21       | wt                           | <i>MATa his3Δ1 leu2Δ0 ura3Δ0 met15Δ0 Est2-8G-myc18::TRP1MX6 trp1::NAT ade2::tTA</i>                                                                   | This study                         |
| LVPS-31/-33   | TetO7-1L                     | <i>MATa his3Δ1 leu2Δ0 ura3Δ0 met15Δ0 Est2-8G-myc18::TRP1MX6 trp1::NAT ade2::tTA</i><br><i>URA_ADH1_TetO7_CYC1_1L_TERRA</i>                            | This study                         |
| LVPS-39/-41   | control                      | <i>MATa his3Δ1 leu2Δ0 ura3Δ0 met15Δ0 Est2-8G-myc18::TRP1MX6 trp1::NAT ade2::tTA</i><br><i>URA_ADH1_1L_TERRA</i>                                       | This study                         |
| LVPS-118      | <i>exo1Δ</i>                 | <i>MATa his3Δ1 leu2Δ0 ura3Δ0 met15Δ0 Est2-8G-myc18::TRP1MX6 trp1::NAT ade2::tTA</i><br><i>exo1::HIS3MX6</i>                                           | This study                         |
| LVPS-123      | <i>exo1Δ</i> /TetO7-1L       | <i>MATa his3Δ1 leu2Δ0 ura3Δ0 met15Δ0 Est2-8G-myc18::TRP1MX6 trp1::NAT ade2::tTA</i><br><i>URA_ADH1_TetO7_CYC1_1L_TERRA exo1::HIS3MX6</i>              | This study                         |
| LVPS-131      | <i>mre11Δ</i>                | <i>MATa his3Δ1 leu2Δ0 ura3Δ0 met15Δ0 Est2-8G-myc18::TRP1MX6 trp1::NAT ade2::tTA</i><br><i>mre11::HIS3MX6</i>                                          | This study                         |
| LVPS-132/-133 | <i>mre11Δ</i> /TetO7-1L      | <i>MATa his3Δ1 leu2Δ0 ura3Δ0 met15Δ0 Est2-8G-myc18::TRP1MX6 trp1::NAT ade2::tTA</i><br><i>URA_ADH1_TetO7_CYC1_1L_TERRA mre11::HIS3MX6</i>             | This study                         |
| LVPS-137      | <i>ku70Δ</i>                 | <i>MATa his3Δ1 leu2Δ0 ura3Δ0 met15Δ0 Est2-8G-myc18::TRP1MX6 trp1::NAT ade2::tTA</i><br><i>ku70::HIS3MX6</i>                                           | This study                         |
| LVPS-138/-139 | <i>ku70Δ</i> /TetO7-1L       | <i>MATa his3Δ1 leu2Δ0 ura3Δ0 met15Δ0 Est2-8G-myc18::TRP1MX6 trp1::NAT ade2::tTA</i><br><i>URA_ADH1_TetO7_CYC1_1L_TERRA ku70::HIS3MX6</i>              | This study                         |
| LVPS-151      | Ku80-8G-3HA/TetO7-1L         | <i>MATa his3Δ1 leu2Δ0 ura3Δ0 met15Δ0 Est2-8G-myc18::TRP1MX6 trp1::NAT ade2::tTA</i><br><i>URA_ADH1_TetO7_CYC1_1L_TERRA Ku80-8G-3HA::HIS3MX6</i>       | This study                         |
|               | <i>est1Δ</i> /TetO7-1L       | <i>MATa his3Δ1 leu2Δ0 ura3Δ0 met15Δ0 Est2-8G-myc18::TRP1MX6 trp1::NAT ade2::tTA</i><br><i>URA_ADH1_TetO7_CYC1_1L_TERRA est1::KANMX6</i>               | This study                         |
|               | <i>est1Δ/exo1Δ</i> /TetO7-1L | <i>MATa his3Δ1 leu2Δ0 ura3Δ0 met15Δ0 Est2-8G-myc18::TRP1MX6 trp1::NAT ade2::tTA</i><br><i>URA_ADH1_TetO7_CYC1_1L_TERRA est1::KANMX6 exo1::HIS3MX6</i> | This study                         |
